# Supplementary material for: Easy and rapid chemosensing method for the identification of accumulated tin in algae: a strategy to protect a marine eco-system
Source: Royal Society of Chemistry journal article supplement (doi:10.1039/d1nj05680h), 2022-01-01
Supplement: d1nj05680h1.pdf [file d1nj05680h1.pdf]

## **SUPPORTING INFORMATION**

Easy and rapid chemosensing method for identification of accumulated Tin in algae: A solemnstrives to protect marine eco-system

*Shrabani Saha<sup>a</sup>, Sreejata Kamila<sup>b</sup>, Ansuman Chattopadhyay<sup>b</sup> and Prithidipa Sahoo<sup>a\*</sup>*

*\*Corresponding author. E-mail:prithidipa@hotmail.com.*

<sup>a</sup> Department of Chemistry, Visva-Bharati University, Santiniketan, 731235, W.B., India.

<sup>b</sup> Department of Zoology, Visva-Bharati University, Santiniketan, 731235, W.B., India.

# 1. NMR Studies:

## <sup>1</sup>H NMR of AFL in DMSO-d<sub>6</sub>:

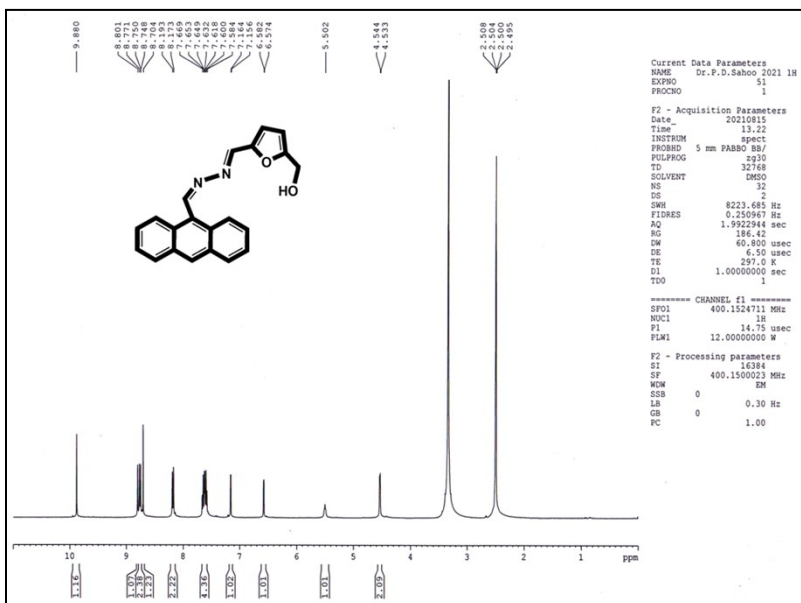

Fig. S1. <sup>1</sup>H NMR of AFL in DMSO-d<sub>6</sub> (400 MHz).

## <sup>13</sup>C NMR of AFL in DMSO-d<sub>6</sub>:

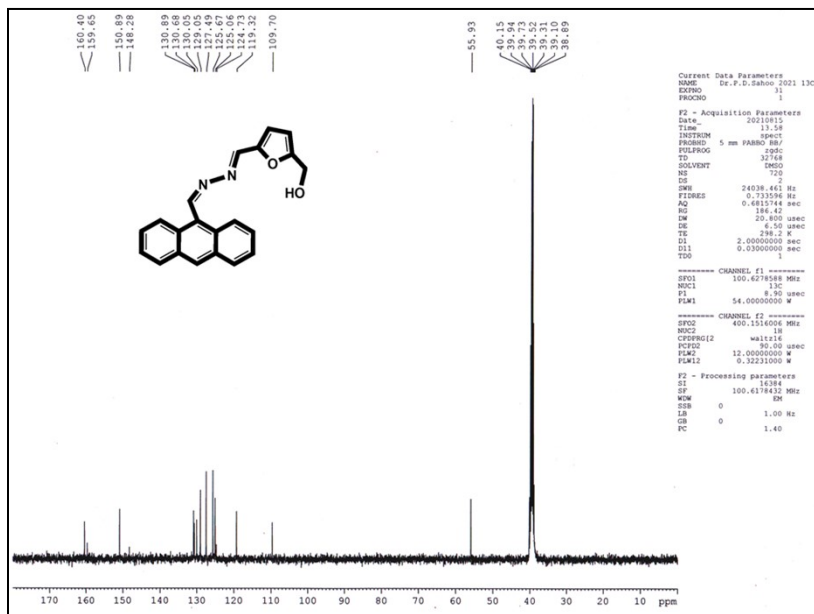

Fig. S2. <sup>13</sup>C NMR of AFL in DMSO-d<sub>6</sub> (400 MHz).

## Mass spectrum of AFL:

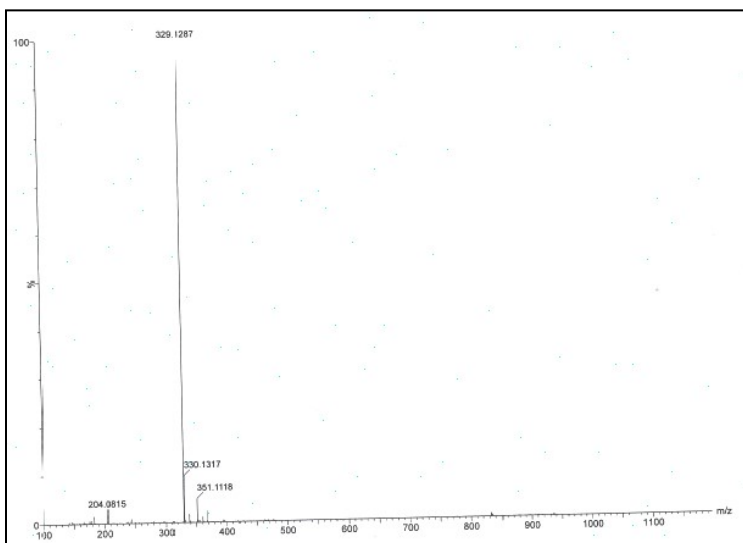

Fig. S3. HRMS of AFL

## 2. Materials and Instruments

9-anthracenecarboxaldehyde, 5-(hydroxymethyl) furfural, methanol, acetonitrile and all the reagents were purchased from Sigma-Aldrich Pvt.Ltd. Unless otherwise mentioned, materials were obtained from commercial suppliers and were used without further purification. Solvents were dried according to standard procedures. Elix Millipore water was used throughout all experiments.  $^1\text{H}$  and  $^{13}\text{C}$  NMR spectra were recorded on a Bruker 400 MHz instrument. For NMR spectra,  $\text{CDCl}_3$ ,  $\text{DMSO-d}_6$  and for NMR titration  $\text{DMSO-d}_6$  and  $\text{D}_2\text{O}$  were used as solvent using TMS as an internal standard. Chemical shifts are expressed in  $\delta$  ppm units and  $^1\text{H}$ - $^1\text{H}$  and  $^1\text{H}$ - $^{13}\text{C}$  coupling constants in Hz. The following abbreviations are used to describe spinmultiplicities in  $^1\text{H}$  NMR spectra: s = singlet; d = doublet; t = triplet; m = multiplet. The mass spectrum (HRMS) was carried out using a micromass Q-TOF Micro<sup>TM</sup> instrument by using Acetonitrile as a solvent. Fluorescence spectra were recorded on a Perkin Elmer Model LS 55 spectrophotometer. UV spectra were recorded on a SHIMADZU UV-3101PC spectrophotometer.

Leica TCS SP8 laser scanning confocal microscope system was used for confocal microscopy. Images obtained through section scanning were analyzed by the LasX software with excitation at 400 nm monochromatic laser beam, and emission spectra were integrated over the range 483 nm (single channel) with 10X magnification.

**3. UV-vis and fluorescence titration.** A stock solution of AFL (1  $\mu\text{M}$ ) was prepared in water-acetonitrile (1:1, v/v).  $\text{Sn}^{2+}$  solution of concentration 10  $\mu\text{M}$  was prepared in Millipore water. All experiments were carried out in aqueous medium at neutral pH. During the titration, each time a 1  $\mu\text{M}$  solution of AFL was filled in a quartz optical cell of 1 cm optical path length

and Sn<sup>2+</sup> stock solution was added into the quartz optical cell gradually by using a micropipette. Spectral data were recorded at 1 min after the addition of Sn<sup>2+</sup>.

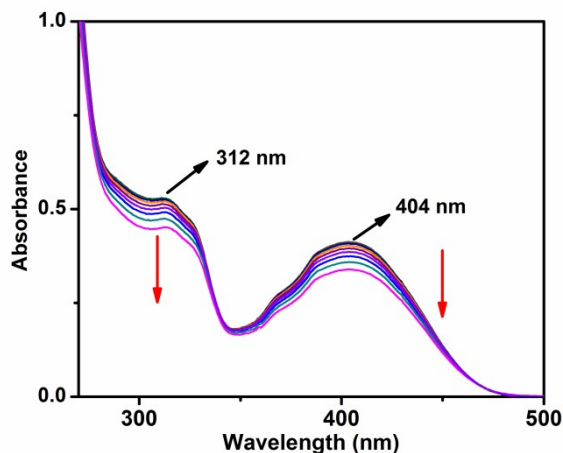

**Fig. S4.** UV–vis absorption spectra of AFL (1 μM) upon incremental addition of Sn<sup>2+</sup> up to 1 μM in H<sub>2</sub>O:CH<sub>3</sub>CN (1:1, v/v) at pH 7.2 (10 mM Tris-Cl buffer)

#### 4. Determination of fluorescence quantum yield

The quantum yield can be calculated as follows:

$$\Phi_D = \{F_D \times A_S \times (n_D)^2 / F_S \times A_D \times (n_S)^2\} \times \Phi_S$$

Where  $\Phi_S$  is the fluorescence quantum yield of the standard (Coumarin 1 in ethanol, 0.73, 25°C),  $F_D$  and  $F_S$  are the integral areas of fluorescence intensity of the chromophore and the standard at the same excitation wavelength, respectively,  $A_D$  and  $A_S$  are the absorbances of the chromophore and the standard at the defined excitation wavelength, respectively, and  $n_S$  and  $n_D$  are the refractive indices at 25°C of the solvents of the standard (ethanol) and of the chromophore, respectively.

#### 5. Evaluation of the association constants for the formation of AFL-Sn<sup>2+</sup> complex:

##### By Fluorescence Method:

Binding constant of the chemosensor AFL was calculated through emission method by using the following equation:

$$1 / (I - I_0) = 1 / K(I_{\max} - I_0) [G] + 1 / (I_{\max} - I_0) \dots\dots\dots(ii)$$

Where  $I_0$ ,  $I_{\max}$ , and  $I$  represent the emission intensity of free AFL, the maximum emission intensity observed in the presence of added Sn<sup>2+</sup> at 483 nm ( $\lambda_{\text{ex}} = 400$  nm), the emission intensity at a certain concentration of the Sn<sup>2+</sup> respectively and  $[G]$  is the concentration of the guest Sn<sup>2+</sup>.

### Binding constant calculation graph (Fluorescence method):

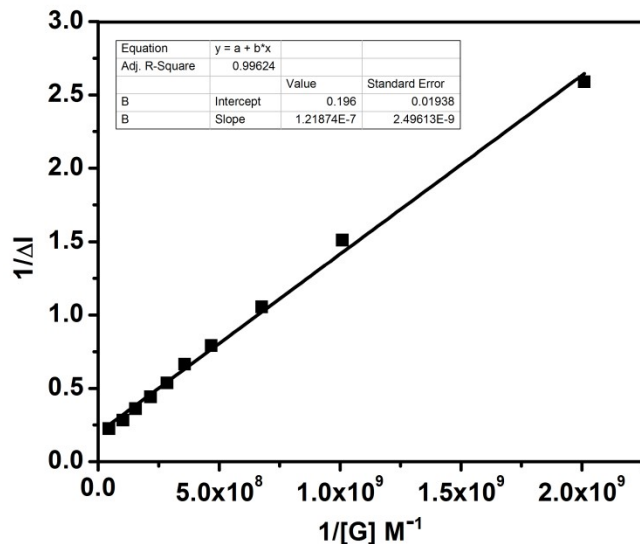

**Fig. S5.** Linear regression analysis for the calculation of association constant value by fluorescence titration method

The association const. ( $K_a$ ) of **AFL** for sensing  $\text{Sn}^{2+}$  was determined from the equation:

$K_a = \text{intercept/slope}$ . From the linear fit graph we get intercept = 0.196, slope =  $1.21874 \times 10^{-7}$ . Thus we get,  $K_a = (0.196) / (1.21874 \times 10^{-7}) = 1.60 \times 10^6 \text{ M}^{-1}$ .

### 6. Calculation of limit of detection (LOD) of **AFL** with $\text{Sn}^{2+}$ :

The detection limit of the chemosensor **AFL** for  $\text{Sn}^{2+}$  was calculated on the basis of fluorescence titration. To determine the standard deviation for the fluorescence intensity, the emission intensity of four individual receptors without  $\text{Sn}^{2+}$  was measured by 10 times and the standard deviation of blank measurements was calculated.

The limit of detection (LOD) of **AFL** for sensing  $\text{Sn}^{2+}$  was determined from the following equation.

$$\text{LOD} = K \times \text{SD}/S$$

Where  $K = 2$  or  $3$  (we take  $3$  in this case);  $\text{SD}$  is the standard deviation of the blank receptor solution;  $S$  is the slope of the calibration curve.

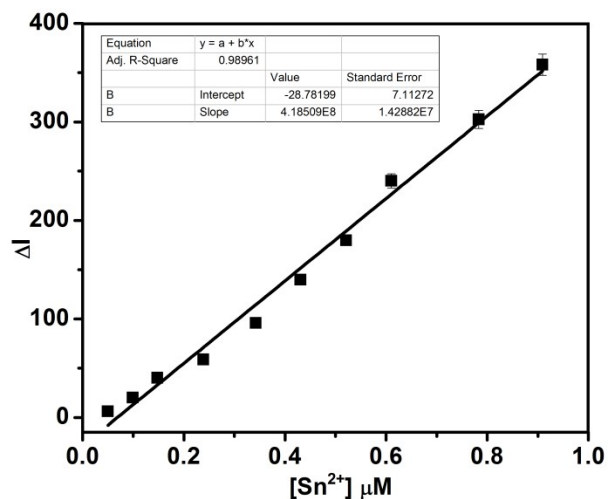

**Fig. S6.** Linear fit curve of AFL at 483 nm with respect to  $\text{Sn}^{2+}$  concentration. Standard deviations are represented by error bar (n=3).

For AFL with  $\text{Sn}^{2+}$ :

From the linear fit graph we get slope =  $4.18509 \times 10^8$ , and SD value is 12.54253

Thus using the above formula we get the Limit of Detection =  $8.990 \times 10^{-8}$  M, i.e 89.9 nM or 90 nM. Therefore AFL can detect  $\text{Sn}^{2+}$  up to this very lower concentration by fluorescence technique.

### 7. Job's plot for determining the stoichiometry of binding by fluorescence method:

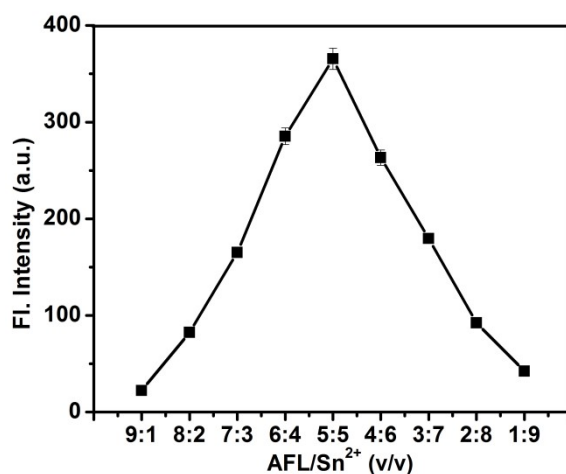

**Fig. S7.** Job's plot of AFL ( $1\mu\text{M}$ ) with  $\text{Sn}^{2+}$  ( $1\mu\text{M}$ ) in acetonitrile-water (1:1, v/v), at neutral pH =7.2 (10 mM Tris-Cl buffer), by fluorescence method ( $\lambda_{\text{ex.}}= 400\text{ nm}$ ), which indicate 1:1 stoichiometry for AFL with  $\text{Sn}^{2+}$  ion. Standard deviations are represented by error bar (n=3).

## 8. Reversible cycle analysis of chemosensing probe AFL

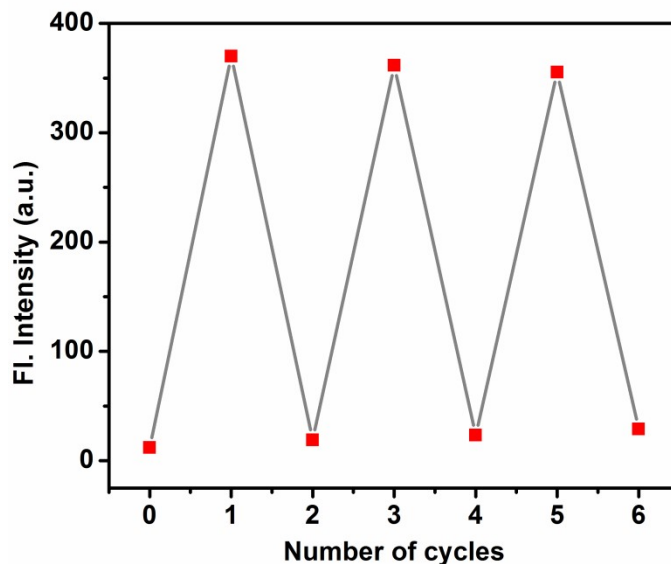

**Fig. S8.** Reversibility cycle analysis of AFL ( $1\times 10^{-6}\text{ M}$ ) with  $\text{Sn}^{2+}$  ( $1\times 10^{-6}$ ) in the presence of EDTA ( $1\times 10^{-5}\text{ M}$ ) in acetonitrile-water (1:1, v/v), buffered with 10 M Tris-Cl buffer (pH 7.2),  $\lambda_{\text{ex.}}= 400\text{ nm}$ .

## 9. Selectivity in presence of other analytes

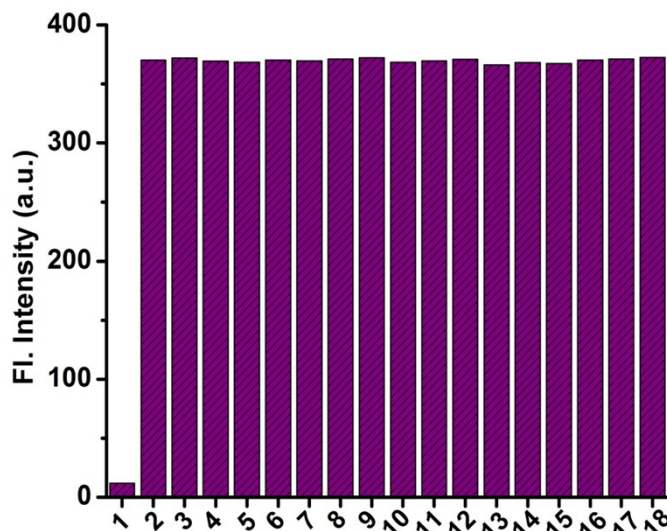

**Fig. S9.** Histogram representing competitive fluorescence spectra of **AFL** with different bio relevant cations at 483 nm ( $\lambda_{\text{ex}} = 400$  nm) in  $\text{CH}_3\text{CN-H}_2\text{O}$  (1:1, v/v), at neutral pH.[From left to right: 1) Only **AFL**, **AFL** with 2)  $\text{Sn}^{2+}$ , 3)  $\text{Sn}^{2+} + \text{Sn}^{4+}$  4)  $\text{Sn}^{2+} + \text{Zn}^{2+}$ , 5)  $\text{Sn}^{2+} + \text{Cu}^{2+}$ , 6)  $\text{Sn}^{2+} + \text{Hg}^{2+}$ , 7)  $\text{Sn}^{2+} + \text{Cd}^{2+}$ , 8)  $\text{Sn}^{2+} + \text{Mg}^{2+}$ , 9)  $\text{Sn}^{2+} + \text{Pb}^{2+}$ , 10)  $\text{Sn}^{2+} + \text{Fe}^{2+}$ , 11)  $\text{Sn}^{2+} + \text{Cr}^{2+}$ , 12)  $\text{Sn}^{2+} + \text{Ni}^{2+}$ , 13)  $\text{Sn}^{2+} + \text{Co}^{2+}$ , 14)  $\text{Sn}^{2+} + \text{Mn}^{2+}$ , 15)  $\text{Sn}^{2+} + \text{Ca}^{2+}$ , 16)  $\text{Sn}^{2+} + \text{Al}^{3+}$ , 17)  $\text{Sn}^{2+} + \text{Na}^+$  and 18)  $\text{Sn}^{2+} + \text{K}^+$ ].

## 10. pH Titration

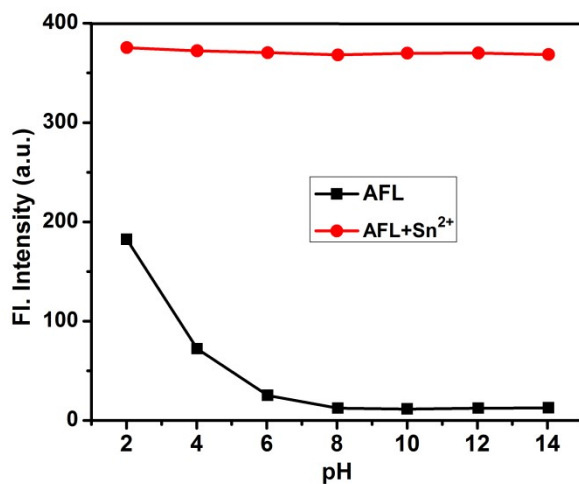

**Fig. S10.** Fluorescence responses of probe **AFL** (black) and **AFL-Sn<sup>2+</sup> complex** (red) in different pH conditions in water-acetonitrile (1:1, v/v) ( $\lambda_{\text{ex}} = 400$  nm).



## 11. $^1\text{H}$ NMR titration studies

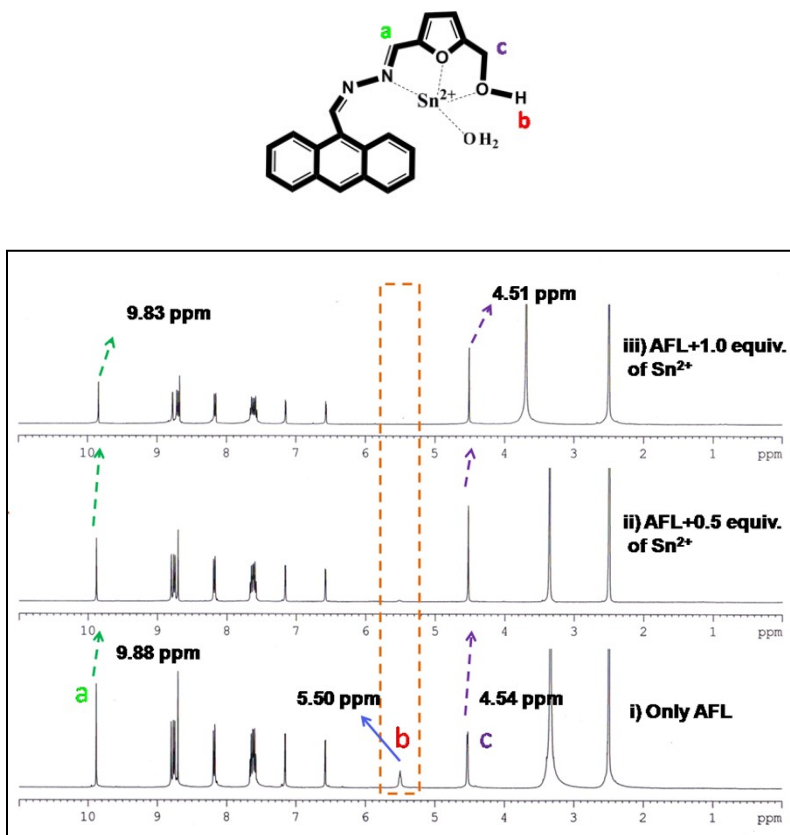

**Fig. S11.**  $^1\text{H}$  NMR titration [400MHz] of AFL in DMSO-d<sub>6</sub> at 25°C and the corresponding changes after the addition of 1 equiv. of Sn<sup>2+</sup> from (i) only AFL, (ii) AFL+ 0.5 equiv. of Sn<sup>2+</sup> (iii) AFL+ 1.0 equiv. of Sn<sup>2+</sup>

## 12. Energy minimized structures of AFL and AFL-Sn<sup>2+</sup> complex

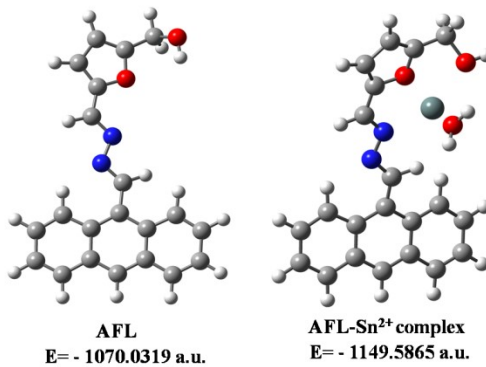

**Fig. S12.** Energy minimized structures of AFL and AFL-Sn<sup>2+</sup> complex from B3LYP level

### 13. Mass spectrum of AFL-Sn<sup>2+</sup> complex:

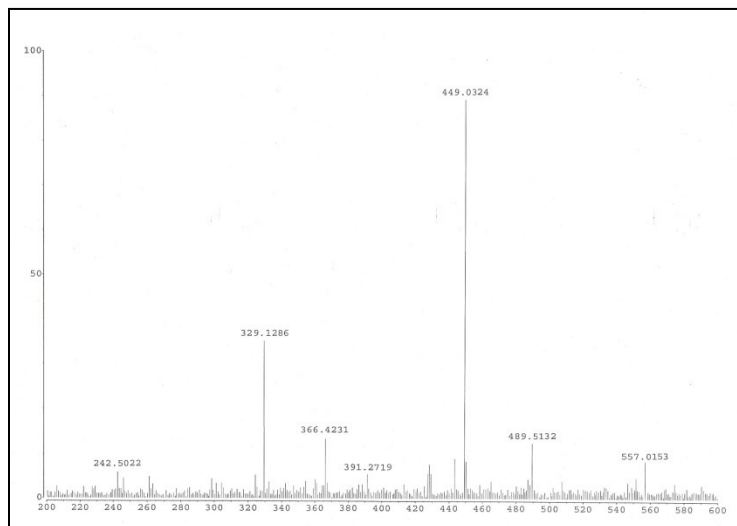

**Fig. S13.** HRMS of AFL-Sn<sup>2+</sup> complex

**14. Table S1** Details of the geometry optimization in Gaussian 09 program.

| Details              | AFL          | AFL-Sn <sup>2+</sup> complex |
|----------------------|--------------|------------------------------|
| Calculation method   | B3LYP        | B3LYP                        |
| Basis set            | 6-311G(d, p) | 6-311G (d, p)<br>/LANL2DZ    |
| E(CAM-B3LYP) (a.u.)  | -1070.0319   | -1149.5865                   |
| Charge, Multiplicity | 0, 1         | +2, 1                        |
| Solvent (CPCM)       | Water        | Water                        |

**15. Table S2.** Selected electronic excitation energies (eV), oscillator strengths (f), main configurations of the low-lying excited states of all the molecules and complexes. The data were calculated by TDDFT//B3LYP/6-311G(d,p)/LANL2DZ based on the optimized ground state geometries.

| Molecules                         | Electronic Transition           | Excitation Energy <sup>a</sup> | f <sup>b</sup> | Composition <sup>c</sup> (%) |
|-----------------------------------|---------------------------------|--------------------------------|----------------|------------------------------|
| <b>AFL</b>                        | S <sub>0</sub> → S <sub>1</sub> | 2.6039eV 476.15 nm             | 0.6611         | H → L (70%)                  |
|                                   | S <sub>0</sub> → S <sub>4</sub> | 3.5528eV 348.98 nm             | 0.3413         | H → L+1 (55%)                |
| <b>AFL-Sn<sup>2+</sup>complex</b> | S <sub>0</sub> → S <sub>4</sub> | 3.1579eV 392.61 nm             | 0.0754         | H-1 → L (67%)                |
|                                   | S <sub>0</sub> → S <sub>7</sub> | 3.4399eV 360.43 nm             | 0.2616         | H-2 → L (48%)                |

<sup>a</sup>Only selected excited states were considered. The numbers in parentheses are the excitation energy in wavelength. <sup>b</sup>Oscillator strength. <sup>c</sup>H stands for HOMO and L stands for LUMO.

**16. Table S3.** Energies of the highest occupied molecular orbital (HOMO) and lowest unoccupied molecular orbital (LUMO)

| Species                           | E <sub>HOMO</sub> (a.u) | E <sub>LUMO</sub> (a.u) | ΔE(a.u) | ΔE(eV) | ΔE(kcal/mol) |
|-----------------------------------|-------------------------|-------------------------|---------|--------|--------------|
| <b>AFL</b>                        | -0.20594                | -0.09813                | 0.10781 | 2.93   | 67.65        |
| <b>AFL-Sn<sup>2+</sup>complex</b> | -0.21964                | -0.13535                | 0.08429 | 2.29   | 52.89        |
